# Supplementary material for: Low-Milliampere CT Fluoroscopy-Guided Percutaneous Drainage Placement after Pancreatic Surgery: Technical and Clinical Outcome in 133 Consecutive Patients during a 14-Year Period
Source: MDPI journal article supplement (doi:10.3390/diagnostics12092243), 2022-09-16
Supplement: s1 [file s1]

**Supplementary Table S1.** Indication for pancreatic surgery in 133 patients who underwent CT-fluoroscopy guided percutaneous drainage of abdominal fluid collections after operation.

| Variable                                  |                                  |
|-------------------------------------------|----------------------------------|
| Age (years)                               | 64 [55, 72] (19–86) <sup>1</sup> |
| Sex                                       |                                  |
| Female                                    | 61 (45.9%) <sup>2</sup>          |
| Male                                      | 72 (54.1%) <sup>2</sup>          |
| Indications for pancreatic resection      |                                  |
| Tumor lesions—Primary:                    | 95 (71.4%) <sup>2</sup>          |
| <i>Solid exocrine tumors</i>              | 49 (36.8%) <sup>2</sup>          |
| Ductal adenocarcinoma                     | 47 (35.3%) <sup>2</sup>          |
| Acinar cell carcinoma                     | 1 (0.8%) <sup>2</sup>            |
| Solid pseudopapillary neoplasm            | 1 (0.8%) <sup>2</sup>            |
| <i>Solid non-exocrine tumors</i>          | 8 (6.0%) <sup>2</sup>            |
| Carcinoma of the distal bile duct         | 6 (4.5%) <sup>2</sup>            |
| Adenoma of the distal bile duct           | 1 (0.8%) <sup>2</sup>            |
| Squamous cell carcinoma                   | 1 (0.8%) <sup>2</sup>            |
| <i>Solid neuroendocrine tumors (NETs)</i> | 19 (14.3%) <sup>2</sup>          |
| <i>Cystic lesions</i>                     | 19 (14.3%) <sup>2</sup>          |
| Intraductal papillary mucinous neoplasm   | 11 (8.3%) <sup>2</sup>           |
| Serous cystoadenoma                       | 7 (5.3%) <sup>2</sup>            |
| Cystic ductal adenocarcinoma              | 1 (0.8%) <sup>2</sup>            |
| Tumor lesions—Secondary:                  | 11 (8.3%) <sup>2</sup>           |
| Renal cell carcinoma                      | 3 (2.3%) <sup>2</sup>            |
| Liposarcoma                               | 3 (2.3%) <sup>2</sup>            |
| Ovarian cancer                            | 2 (1.5%) <sup>2</sup>            |
| Melanoma                                  | 1 (0.8%) <sup>2</sup>            |
| Gastrointestinal Stromal Tumor            | 1 (0.8%) <sup>2</sup>            |
| Endometrial Carcinoma                     | 1 (0.8%) <sup>2</sup>            |
| Tumor-like lesions:                       | 25 (18.8%) <sup>2</sup>          |
| Focal pancreatitis                        | 14 (10.5%) <sup>2</sup>          |
| Pseudocysts                               | 6 (4.5%) <sup>2</sup>            |
| Fatty infiltration                        | 1 (0.8%) <sup>2</sup>            |
| Echinococcosis                            | 1 (0.8%) <sup>2</sup>            |
| Castleman disease                         | 1 (0.8%) <sup>2</sup>            |
| Desmoid                                   | 1 (0.8%) <sup>2</sup>            |
| Tuberculosis                              | 1 (0.8%) <sup>2</sup>            |
| Other reasons:                            | 2 (1.5%) <sup>2</sup>            |
| Trauma                                    | 1 (0.8%) <sup>2</sup>            |
| Extremely elevated serum tumor markers    | 1 (0.8%) <sup>2</sup>            |

<sup>1</sup>: Median [25%, 75% quartile] (range), <sup>2</sup>: Numbers (Percentage)

**Supplementary Table S2.** Parameters of the generalized linear mixed models (GLMM) used in Figure 6.

| <i>Predictors</i>                                       | <b>C-reactive Protein</b> |            |                   | <b>Leukocyte Count</b> |            |                   | <b>Interleukin-6</b> |            |                   |
|---------------------------------------------------------|---------------------------|------------|-------------------|------------------------|------------|-------------------|----------------------|------------|-------------------|
|                                                         | <i>Estimates</i>          | <i>CI</i>  | <i>p</i>          | <i>Estimates</i>       | <i>CI</i>  | <i>p</i>          | <i>Estimates</i>     | <i>CI</i>  | <i>p</i>          |
| (Intercept)                                             | 1.02                      | 0.90–1.14  | <b>&lt;0.001</b>  | 1.08                   | 1.03–1.12  | <b>&lt;0.001</b>  | 2.05                 | 1.83–2.28  | <b>&lt;0.001</b>  |
| Time (days)                                             | −0.04                     | −0.04–0.03 | <b>&lt;0.0001</b> | −0.01                  | −0.01–0.01 | <b>&lt;0.0001</b> | −0.04                | −0.05–0.04 | <b>&lt;0.0001</b> |
| <b>Random Effects</b>                                   |                           |            |                   |                        |            |                   |                      |            |                   |
| $\sigma^2$                                              | 0.11                      |            |                   | 0.01                   |            |                   | 0.05                 |            |                   |
| $\tau_{00}$                                             | 0.15 Subject ID           |            |                   | 0.02 Subject ID        |            |                   | 0.13 Subject ID      |            |                   |
| ICC                                                     | 0.57                      |            |                   | 0.63                   |            |                   | 0.71                 |            |                   |
| N                                                       | 49 Subject ID             |            |                   | 55 Subject ID          |            |                   | 12 Subject ID        |            |                   |
| Observations                                            | 417                       |            |                   | 507                    |            |                   | 83                   |            |                   |
| Marginal R <sup>2</sup> /<br>Conditional R <sup>2</sup> | 0.269 / 0.689             |            |                   | 0.117 / 0.672          |            |                   | 0.349 / 0.814        |            |                   |

CI: Confidence Interval; R<sup>2</sup>: Coefficient of Determination;  $\sigma^2$ : distribution-specific variance;  $\tau_{00}$ : between-subject-variance; ICC: intraclass correlation coefficient, N: number of subjects.

**Supplementary Table S3.** Visual appearance of the drainage fluid depending on the infection status and presence of POPF.

| <b>Visual appearance <sup>1</sup></b> |            | <b>Pancreatic fistula</b> | <b>Proof of germs <sup>2</sup></b> |                 |
|---------------------------------------|------------|---------------------------|------------------------------------|-----------------|
|                                       |            |                           | <i>Positive</i>                    | <i>Negative</i> |
| Bloody                                | 18 (15.4%) | <i>Present</i>            | 3 (17.6%)                          | 7 (41.2%)       |
|                                       |            | <i>Not present</i>        | 3 (17.6%)                          | 4 (23.6%)       |
| Chylus                                | 2 (1.7%)   | <i>Present</i>            | 0 (0.0 %)                          | 0 (0.0 %)       |
|                                       |            | <i>Not present</i>        | 1 (50.0%)                          | 1 (50.0%)       |
| Purulent                              | 54 (46.2%) | <i>Present</i>            | 11 (22.0 %)                        | 5 (10.0 %)      |
|                                       |            | <i>Not present</i>        | 29 (58.0 %)                        | 5 (10.0 %)      |
| Bilious                               | 17 (14.5%) | <i>Present</i>            | 4 (23.5 %)                         | 2 (11.8%)       |
|                                       |            | <i>Not present</i>        | 7 (41.2 %)                         | 4 (23.5 %)      |
| Serous                                | 26 (22.2%) | <i>Present</i>            | 5 (20.0 %)                         | 6 (24.0 %)      |
|                                       |            | <i>Not present</i>        | 6 (24.0 %)                         | 8 (32.0 %)      |

<sup>1</sup>: Numbers (Percentage). The group includes all cases where the visual appearance of the drainage fluid was documented (n = 117). Percentages refer to the column values. <sup>2</sup>: Numbers (Percentage). Subgroup in which germ detection and biochemical testing for the presence of a POPF were performed (n = 111). Percentages refer to the values of the corresponding 2 × 2 contingency table. Values in bold indicates significant result in Chi<sup>2</sup>-test. POPF: postoperative pancreatic fistula.
