# Supplementary figures and images for: Low-Milliampere CT Fluoroscopy-Guided Percutaneous Drainage Placement after Pancreatic Surgery: Technical and Clinical Outcome in 133 Consecutive Patients during a 14-Year Period
Source: MDPI journal article supplement (doi:10.3390/diagnostics12092243), 2022-09-16

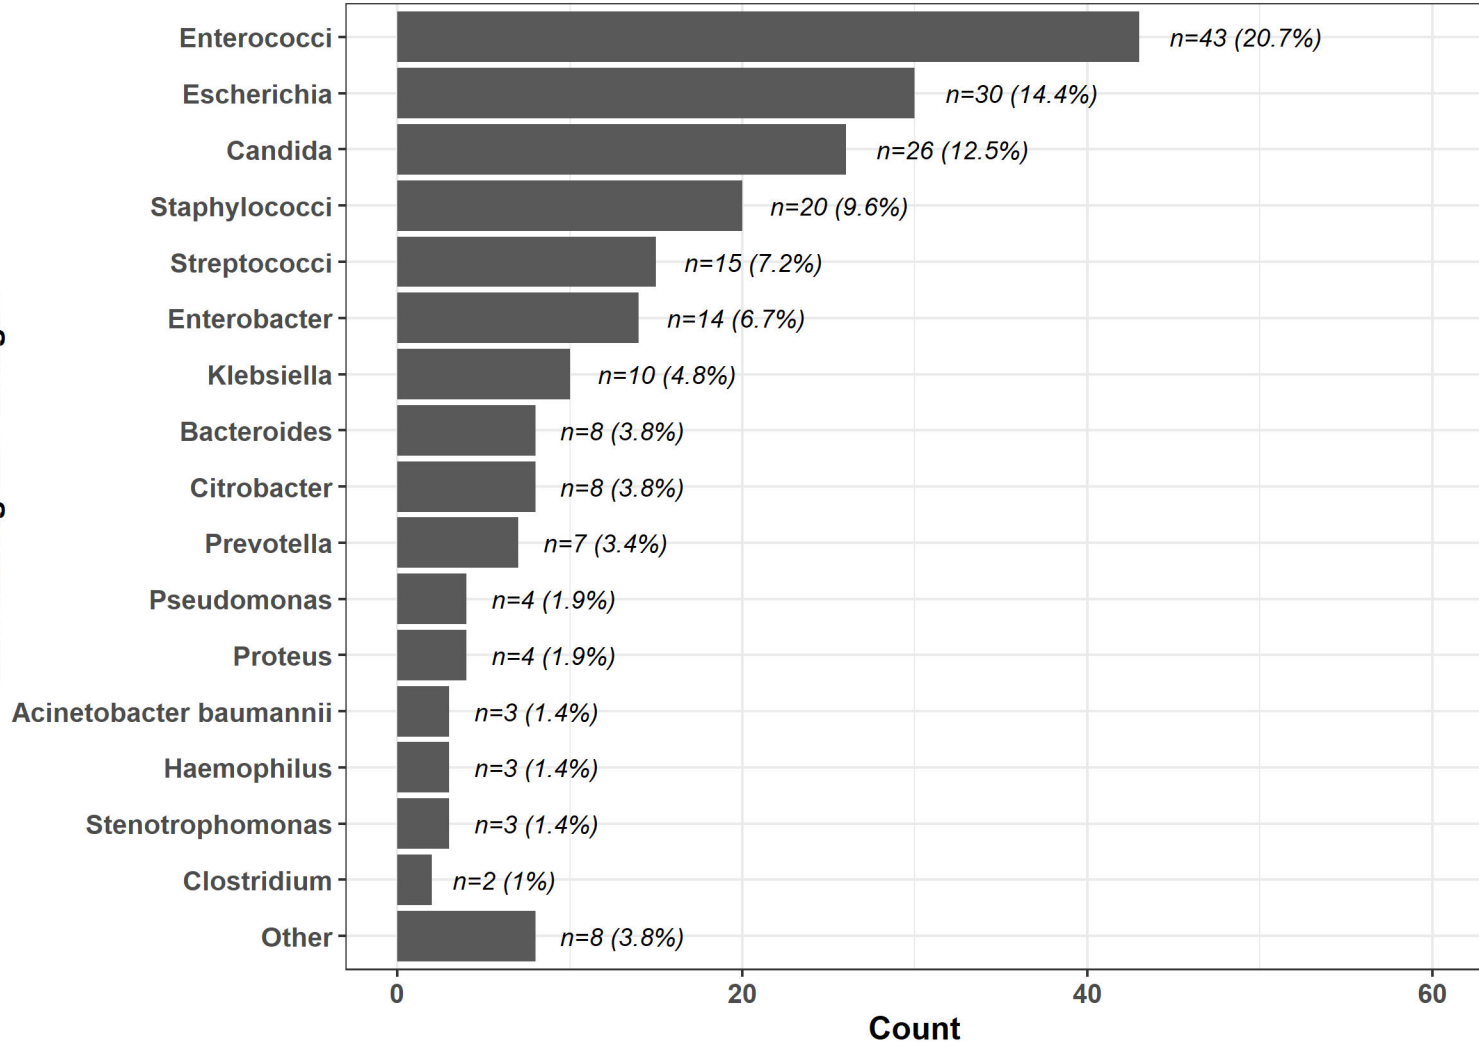

Supplement: s1 [file s1]

Time course of Serum Amylase

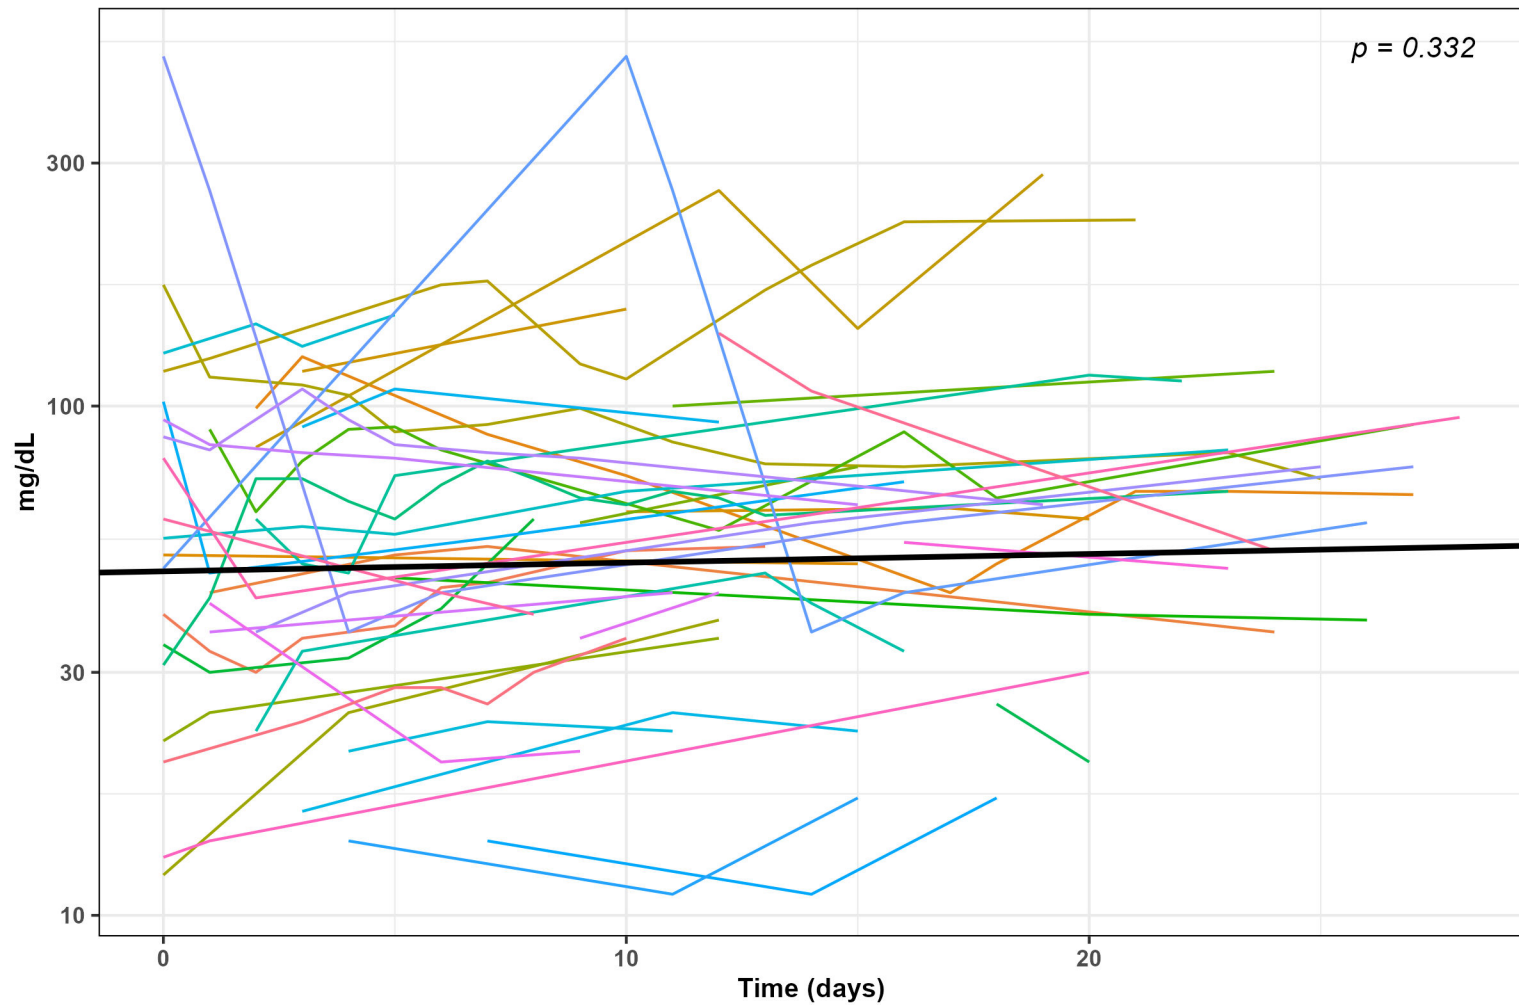

Supplement: s1 [file s1]
